# Supplementary material for: Antifungal activity and mechanism of novel peptide Glycine max antimicrobial peptide (GmAMP) against fluconazole-resistant Candida tropicalis
Source: PeerJ. 2025 May 20;13:e19372. doi: 10.7717/peerj.19372 (PMC12101439; doi:10.7717/peerj.19372)
Supplement: Supplemental Information 1 [file peerj-13-19372-s001.xlsx]

## Sheet: Table 1
		GmAMP
		100 µM	0.056	0.047	0.041	0.053	0.051	0.052	0.051	0.049	0.047	0.063	0.05	0.052	0.049	0.052	0.055
		50 µM	0.046	0.065	0.05	0.059	0.055	0.053	0.072	0.05	0.05	0.052	0.054	0.056	0.047	0.047	0.059
		25 µM	0.061	0.068	0.059	0.092	0.094	0.078	0.983	0.112	0.088	0.904	0.088	0.817	0.049	0.046	0.05
		12 µM	0.054	0.064	0.052	0.135	0.123	0.109	0.117	0.103	0.108	0.116	0.099	0.104	0.079	0.893	0.912
		6 µM	0.099	0.094	0.086	0.111	0.12	0.117	0.12	0.117	0.117	0.097	0.108	0.115	0.101	0.123	0.111
		3 µM	0.12	0.117	0.117	0.123	0.121	0.127	0.112	0.1	0.132	0.138	0.115	0.094	0.114	0.104	0.126
		Control	0.132	0.133	0.103	0.137	0.116	0.135	0.112	0.139	0.125	0.131	0.122	0.126	0.116	0.103	0.112
			C. tropicalis ATCC 20962			C. tropicalis 8402			C. tropicalis 6984			C. tropicalis 4171			C. tropicalis 4252
		Fluconazole
		3343 µM	0.118	0.1	0.107	0.104	0.113	0.141	0.091	0.112	0.097	0.114	0.116	0.112
		1672 µM	0.15	0.111	0.107	0.127	0.124	0.13	0.103	0.108	0.1	0.106	0.117	0.08
		836 µM	0.104	0.113	0.107	0.117	0.133	0.086	0.106	0.112	0.132	0.121	0.111	0.117
		418 µM	0.118	0.122	0.152	0.117	0.103	0.108	0.111	0.091	0.1	0.114	0.104	0.125
		209 µM	0.112	0.096	0.11	0.091	0.107	0.086	0.135	0.112	0.103	0.105	0.116	0.133
		Control	0.154	0.144	0.144	0.14	0.112	0.112	0.121	0.117	0.132	0.106	0.117	0.094
			C. tropicalis 8402			C. tropicalis 6984			C. tropicalis 4171			C. tropicalis 4252
		Fluconazole
		104 µM	0.054	0.055	0.053
		52 µM	0.066	0.045	0.049
		26 µM	0.055	0.051	0.053
		13 µM	0.051	0.064	0.053
		7 µM	0.083	0.074	0.07
		3 µM	0.118	0.112	0.091
		Control	0.117	0.103	0.112
			C. tropicalis ATCC 20962
		GmAMP
	serum stability test(15% FBS)	100 µM	0.063	0.054	0.052
		50 µM	0.069	0.052	0.049
		25 µM	0.063	0.068	0.051
		Control	1.339	1.339	1.339
			C. tropicalis 4252
