# Supplementary material for: Antifungal activity and mechanism of novel peptide Glycine max antimicrobial peptide (GmAMP) against fluconazole-resistant Candida tropicalis
Source: PeerJ. 2025 May 20;13:e19372. doi: 10.7717/peerj.19372 (PMC12101439; doi:10.7717/peerj.19372)
Supplement: Supplemental Information 2 [file peerj-13-19372-s002.xlsx]

## Sheet: Figure 2 
Figure 2A
	Time (h)	Growth control						GmAMP (25 µM)						4						GmAMP(100 µM)
	0	0.0125	0.0152	0.0111	0.0135	0.0162	0.0143	0.0141	0.0152	0.0114	0.0123	0.0181	0.0165	0.0151	0.0112	0.0132	0.0112	0.012	0.014	0.015	0.0123	0.0133	0.012	0.0131	0.0143
	2	0.033	0.036	0.03	0.034	0.037	0.032	0.095	0.09	0.084	0.087	0.086	0.081	0.093	0.112	0.108	0.088	0.093	0.096	0.02	0.03	0.023	0.017	0.02	0.036
	4	0.237	0.24	0.219	0.232	0.253	0.234	0.173	0.173	0.147	0.165	0.148	0.144	0.042	0.088	0.159	0.085	0.046	0.041	0.039	0.044	0.048	0.003	0.013	0.033
	6	0.663	0.677	0.648	0.669	0.702	0.657	0.328	0.325	0.263	0.314	0.315	0.281	0.099	0.128	0.156	0.067	0.052	0.096	0.046	0.048	0.046	0.014	0.005	0.009
	8	1.077	1.071	1.059	1.101	1.092	1.041	0.652	0.67	0.596	0.671	0.666	0.603	0.147	0.213	0.238	0.144	0.043	0.168	0.027	0.042	0.031	0.035	0.028	0.013
	10	1.183	1.198	1.189	1.211	1.216	1.106	0.912	0.935	0.904	0.954	0.936	0.889	0.251	0.339	0.366	0.195	0.312	0.269	0.018	0.04	0.0335	0.043	0.038	0.021
	12	1.277	1.224	1.226	1.241	1.254	1.219	1.012	1.033	1	1.027	1.017	1.002	0.369	0.464	0.498	0.327	0.407	0.398	0.023	0.0301	0.0399	0.046	0.041	0.03
	18	1.502	1.448	1.411	1.409	1.42	1.361	1.183	1.19	1.189	1.201	1.216	1.156	0.55	0.537	0.556	0.577	0.624	0.596	0.032	0.0417	0.0308	0.056	0.058	0.046
	24	1.515	1.548	1.505	1.531	1.541	1.472	1.197	1.204	1.199	1.221	1.1234	1.229	0.793	0.828	0.849	0.774	0.72	0.79	0.0522	0.0237	0.0312	0.059	0.061	0.048
	36	1.549	1.555	1.508	1.53	1.544	1.494	1.341	1.275	1.282	1.272	1.223	1.291	0.836	0.822	0.841	0.756	0.709	0.775	0.046	0.041	0.041	0.068	0.075	0.055
	48	1.58	1.588	1.575	1.592	1.581	1.551	1.362	1.329	1.336	1.339	1.316	1.332	0.788	0.824	0.841	0.77	0.709	0.771	0.03501	0.05	0.048	0.071	0.09	0.02
Figure 2B
	Time (h)	Growth control						GmAMP (25 µM)						GmAMP (50 µM)						GmAMP(100 µM)
	0	1000000	1000000	1000000	1000000	1000000	1000000	1000000	1000000	1000000	1000000	1000000	1000000	1000000	1000000	1000000	1000000	1000000	1000000	1000000	1000000	1000000	1000000	1000000	1000000
	2	2000000	1800000	1600000	1900000	2400000	2100000	8000	16000	12000	14000	18000	16000	800	1000	1400	1000	1600	600	0	0	0	0	0	0
	4	24000000	18000000	19000000	22000000	19000000	25000000	20000	20000	22000	20000	24000	18000	600	800	1600	800	1000	1200	0	0	0	0	0	0
	6	100000000	16000000	16000000	14000000	12000000	16000000	32000	50000	26000	36000	34000	38000	2000	3600	2200	3800	2600	4000	0	0	0	0	0	0
	8	122000000	138000000	144000000	148000000	140000000	130000000	80000	70000	60000	70000	76000	48000	8600	9600	8400	10000	7800	11000	0	0	0	0	0	0
	10	212000000	220000000	236000000	230000000	216000000	228000000	780000	760000	800000	820000	780000	860000	36000	40000	28000	50000	36000	52000	0	0	0	0	0	0
	12	440000000	400000000	280000000	320000000	360000000	400000000	5000000	6000000	4000000	5200000	3800000	4800000	240000	300000	180000	360000	260000	380000	0	0	0	0	0	0
