# Supplementary material for: Antifungal activity and mechanism of novel peptide Glycine max antimicrobial peptide (GmAMP) against fluconazole-resistant Candida tropicalis
Source: PeerJ. 2025 May 20;13:e19372. doi: 10.7717/peerj.19372 (PMC12101439; doi:10.7717/peerj.19372)
Supplement: Supplemental Information 3 [file peerj-13-19372-s003.xlsx]

## Sheet: Figure 3
Figure 3C
	Control	GmAMP(50 µM)	GmAMP(100 µM)	GmAMP(200 µM)
	100	56	29.5	9.6
	100	53.1	27	12.9
	100	46.1	29.7	16.2
	100	54.8	33.7	7.7
	100	46.3	27.3	10.7
	100	48.3	25.5	16.5
	100	46.7	39.8	16.6
	100	53.7	24.6	8.9
	100	47.7	21.7	6.4
Figure 3D
	Control	GmAMP(50 µM)	GmAMP(100 µM)	GmAMP(200 µM)
	100	84.2	57	40.7
	100	77.9	53	43
	100	86.8	62.9	44.3
	100	78.9	51.8	43.9
	100	83.1	55.5	44.8
	100	81.1	53.9	42.1
	100	79.7	65.4	32.1
	100	83.7	58.1	45.1
	100	87.2	64.1	39.8
