# Supplementary material for: Antifungal activity and mechanism of novel peptide Glycine max antimicrobial peptide (GmAMP) against fluconazole-resistant Candida tropicalis
Source: PeerJ. 2025 May 20;13:e19372. doi: 10.7717/peerj.19372 (PMC12101439; doi:10.7717/peerj.19372)
Supplement: Supplemental Information 4 [file peerj-13-19372-s004.xlsx]

## Sheet: Figure 4
Figure 4D	Control	GmAMP(25 μM)	GmAMP(50 μM)	GmAMP(100 μM)
	1.86	45.02	77.68	83.63
	3.81	44.8	77.07	83.72
	1.76	46.5	75.81	85.02
Figure 4E
		fluorescence intensity
	Time(min)	Cnotrol			GmAMP (25 μM)			GmAMP (50 μM)			GmAMP (100 μM)
	0	4749	5878	3996	6129	5614	5498	5501	5042	5454	5463	5007	5415
	2	4879	5750	4115	6426	6109	6838	8627	7414	8347	6259	7474	8592
	4	4847	5544	3952	6687	6420	6816	9542	7461	9223	6886	7563	8629
	6	4657	5263	3835	6782	6839	6930	10219	7165	9972	8038	8860	9665
	8	4552	5179	3661	6860	7219	6942	11552	7008	10796	8694	9745	10827
	10	4336	4761	3622	7153	7490	7124	13309	7406	11460	9854	10019	11908
	12	4122	4521	3352	7245	7816	7365	15281	7895	12445	11385	10660	13089
	14	4020	4326	3209	7809	8448	7921	16779	8733	13554	13921	12456	14811
	16	3785	3971	3024	8439	8640	8138	17939	10111	14656	15649	14068	16221
	18	3586	3848	2937	8721	8852	8315	18629	11804	15615	16928	15182	17241
	20	3440	3602	2776	9086	9032	8541	19269	14076	16122	17814	15942	17841
	22	3217	3406	2624	9119	8946	8628	19462	15425	16446	18434	16317	18206
	24	3151	3247	2412	9469	9245	8651	19865	16353	17003	18748	16952	19337
	26	2957	3010	2324	9698	9363	9115	19851	17365	17417	19564	17286	19553
	28	2843	2901	2173	9975	9570	9082	20317	18128	17567	19900	17805	19876
	30	2771	2656	2059	10038	9469	9066	20252	18641	17467	20124	18168	20120
	32	2643	2612	2003	10061	9577	9188	19959	19129	17606	20384	18462	20426
	34	2523	2435	1957	10101	9868	9145	20341	19193	17551	20343	18759	20758
	36	2408	2376	1746	10071	9823	9267	20086	19386	17478	20621	18956	20668
	38	2300	2235	1682	10240	9984	9236	20197	19459	17702	20552	19045	20938
	40	2264	2173	1599	10368	9958	9125	20161	19613	17741	20839	19205	20987
	42	2251	2087	1549	10516	10034	9118	20432	19601	17787	21107	19384	21218
	44	2120	1970	1473	10337	10084	9181	20595	19750	17982	20827	19194	21241
	46	1964	1967	1375	10317	10165	9189	20817	19849	18039	21077	19399	21239
	48	1963	1902	1317	10368	10146	9090	20614	19977	18113	21121	19697	21231
	50	1953	1830	1330	10242	10044	9148	20806	19958	18190	21056	19752	21085
	52	1815	1771	1247	10228	9922	9066	20635	20279	18308	21219	19746	21161
	54	1814	1726	1178	10333	10221	9037	20615	20331	18076	21197	19679	21227
	56	1671	1678	1168	10346	10167	9095	20562	20349	18489	20921	19789	21134
	58	1598	1628	1125	10224	9988	9007	20652	20496	18417	20955	19913	21051
	60	1653	1527	1086	10335	10049	8962	20585	20524	18475	20882	19848	21280
Figure 4F
		fluorescence intensity
	Time(min)	Cnotrol			GmAMP (25 μM)			GmAMP (50 μM)			GmAMP (100 μM)			NAC+GmAMP(25 μM)			NAC+GMAMP(50 μM)			NAC+GmAMP(100 μM)
	0	265	311	311	1366	1581	1343	1100	1009	1405	717	779	822	61	107	113	117	114	96	105	111	98
	2	300	303	312	1700	1898	1899	1566	1218	2311	1065	1198	1319	63	119	99	112	113	116	113	116	112
	4	312	322	299	2128	2460	2397	2075	1673	2459	1590	1579	1846	64	109	103	100	112	96	124	119	108
	6	354	294	345	2973	4128	3430	2917	2538	3923	2393	2520	3172	62	114	117	103	111	93	120	120	107
	8	386	314	321	4155	5919	5485	4180	4021	5438	3678	3874	4914	59	109	101	106	104	105	115	108	105
	10	349	295	331	5761	7987	7216	5544	5331	7502	5337	5707	6972	60	110	118	121	105	106	122	107	106
	12	310	323	321	7958	9166	9241	7259	6993	9492	7417	7617	9537	60	112	111	96	109	102	123	113	117
	14	303	306	312	9613	10803	10732	9248	8799	11465	9577	9884	12477	58	112	128	116	122	112	121	111	105
	16	487	296	340	11564	12458	12233	10928	10513	13873	11872	12115	14874	59	127	120	113	116	117	121	112	108
	18	340	327	334	13155	14292	13899	13249	13141	15824	14086	14822	17648	74	129	115	121	111	117	116	116	113
	20	334	355	302	14649	15898	15168	16294	14922	18077	16383	17031	20075	64	118	130	119	112	127	126	114	119
	22	383	325	330	16130	17554	16798	19036	17560	19934	18706	19619	22386	65	114	131	124	142	132	120	114	109
	24	397	342	335	17501	19118	18123	21446	19957	21814	21078	21692	24378	54	132	144	131	120	159	128	127	113
	26	399	361	336	19007	20410	19299	23919	22064	23714	23018	23788	26919	60	132	146	147	146	136	127	127	127
	28	399	353	352	20305	21711	20681	26605	25602	25485	25750	26218	28205	59	151	140	137	141	147	129	131	120
	30	378	365	323	21752	23052	21871	28109	27369	27087	27971	27708	29346	60	153	155	153	142	144	127	118	132
	32	364	367	365	23075	24112	23029	29950	29303	28383	30280	30546	31802	59	153	163	151	153	159	149	131	146
	34	367	360	341	24161	25541	23971	31794	30235	29926	32133	31388	33786	62	160	172	135	166	166	136	138	137
	36	372	367	369	25435	26619	25044	33233	31392	31183	34058	33704	35729	60	165	198	179	171	162	142	147	132
	38	375	378	379	26351	27690	26042	34455	33027	32253	36237	36401	36894	54	157	185	186	176	157	157	139	156
	40	383	398	373	27384	28931	27047	36051	33975	33191	37859	36894	38695	67	167	205	200	170	174	154	153	152
	42	428	397	377	28364	29683	28027	37168	34585	34483	39108	38106	39797	65	186	200	196	206	178	164	150	160
	44	433	417	392	29584	30880	29157	38356	36185	35633	41657	39481	40609	63	168	215	201	193	197	163	149	156
	46	437	368	399	30780	31721	29690	39276	37084	36721	41809	41180	42011	66	193	253	201	189	188	173	159	163
	48	443	396	397	31082	32914	30615	40312	37958	37535	43288	41607	43145	64	213	234	217	204	213	169	177	168
	50	453	416	393	31980	33593	31395	41367	39093	38820	44570	42377	43755	62	192	251	230	189	207	175	161	167
	52	452	407	399	32876	34491	32355	42434	40364	39398	45385	43921	45006	57	209	255	224	216	209	188	169	165
	54	459	424	410	34145	35389	33211	43887	41447	40524	46403	45161	45743	66	216	263	228	216	228	197	174	170
	56	469	454	416	34679	35941	34030	44382	42226	41495	47137	46447	46587	65	227	277	236	226	222	180	166	179
	58	471	401	428	35298	36855	34854	45234	43044	42310	48630	45998	46881	75	232	298	243	229	242	187	175	183
	60	482	446	423	36369	37808	35110	46127	44239	43573	49281	47230	47791	63	235	293	275	251	233	198	185	173
