# Supplementary material for: Antifungal activity and mechanism of novel peptide Glycine max antimicrobial peptide (GmAMP) against fluconazole-resistant Candida tropicalis
Source: PeerJ. 2025 May 20;13:e19372. doi: 10.7717/peerj.19372 (PMC12101439; doi:10.7717/peerj.19372)
Supplement: Supplemental Information 5 [file peerj-13-19372-s005.xlsx]

## Sheet: Figure 5
Figure 5A
	GmAMP Concentration (μM)	Percentage hemolysis(%)
	0	0.11	0.23	0.11	0.23
	1	0.23	0.11	0.34	0.11
	3	0.11	0.34	0.11	0.23
	6	0.23	0.34	0.34	0.34
	12	0.34	0.11	0.34	0.46
	25	0.11	0.23	0.23	0.46
	50	0.23	0.23	0	0.11
	100	0.23	0.34	0.11	0.23
	200	26.7	34.6	48.47	32.77
Figure 5B
	GmAMP Concentration (μM)	Cell viability (%)
	0	95.223	107.945	100.016	105.372	94.447	109.355	96.28	95.892	95.469
	1	107.078	105.995	91.126	97.442	96.612	104.732	102.242	103.433	99.607
	3	103.721	97.225	98.777	99.354	103.18	97.045	100.437	101.989	103.469
	6	88.564	91.343	89.682	92.389	93.039	101.989	86.867	89.285	89.971
	12	99.86	96.72	93.183	95.962	94.951	100.365	91.992	93.039	92.353
	25	91.91	90.183	93.989	104.527	102.13	95.575	92.122	91.945	92.474
	50	95.551	90.841	97.073	98.631	93.123	97.617	100.986	101.023	98.233
	100	85.784	77.797	89.585	84.248	94.616	92.158	88.549	92.196	88.664
	200	86.667	78.373	78.834	73.496	80.561	74.034	88.472	84.401	86.974
