# Supplementary material for: Antifungal activity and mechanism of novel peptide Glycine max antimicrobial peptide (GmAMP) against fluconazole-resistant Candida tropicalis
Source: PeerJ. 2025 May 20;13:e19372. doi: 10.7717/peerj.19372 (PMC12101439; doi:10.7717/peerj.19372)
Supplement: Supplemental Information 6 [file peerj-13-19372-s006.xlsx]

## Sheet: Figure 6
Figure 6B
	Day n post-injection	No treatment	PBS	GmAMP(8 mg/kg)	GmAMP(16 mg/kg)	GmAMP(32 mg/kg)
	1	0	0	0	0	0
	1	0	0	0	0	0
	2	0	0	0	0	0
	2	0	0	0	0	0
	3	0	0	0	0	0
	3	0	0	0	0	0
	4	0	0	0	0	0
	4	0	0	0	0	0
	5	0	0	0	0	0
	5	0	0	0	0	0
Figure 6C
	Day n post-injection	PBS+PBS	C.tropicalis+PBS	C.tropicalis+GmAMP(8 mg/kg)	C.tropicalis+GmAMP(16 mg/kg)	C.tropicalis+GmAMP(32 mg/kg)
	1		1
	1		1
	1		1
	1		1
	1		1
	2		1
	2		1
	2		1
	5		0
	5		0
	5		0
	5		0
	1			1
	1			1
	1			1
	1			1
	2			1
	2			1
	5			0
	5			0
	5			0
	5			0
	5			0
	5			0
	1				1
	1				1
	1				1
	2				1
	2				1
	5				0
	5				0
	5				0
	5				0
	5				0
	5				0
	5				0
	1					1
	1					1
	2					1
	5					0
	5					0
	5					0
	5					0
	5					0
	5					0
	5					0
	5					0
	5					0
	5	0
	5	0
	5	0
	5	0
	5	0
	5	0
	5	0
	5	0
	5	0
	5	0
	5	0
	5	0
Figure 6D
	C. tropicalis+PBS	333333333	460000000	653333333	806666667	466666667	380000000	680000000	640000000	326666667
	C. tropicalis+GmAMP(8 mg/kg)	114666667	154666667	136666667	89333333	90666667	70000000	78000000	83333333	77333333
	C. tropicalis+GmAMP(16 mg/kg)	58000000	63333333	40000000	103333333	46666667	92000000	62666667	49333333	40000000
	C. tropicalis+GmAMP(32 mg/kg)	6000000	6533333	4200000	10533333	4866667	9400000	6466667	5133333	4200000
